# Supplementary material for: Effect of the Fluorination of Graphene Nanoflake on the Dispersion and Mechanical Properties of Polypropylene Nanocomposites
Source: MDPI journal article supplement (doi:10.3390/nano10061171), 2020-06-16
Supplement: s1 [file s1]

## **Supplementary Materials**

# **Effect of the fluorination of graphene nanoflake on the dispersion and mechanical properties of polypropylene nanocomposites**

**Min Gyu Lee <sup>1</sup>, Sangwoon Lee <sup>1</sup>, Jaehyun Cho <sup>2</sup>, Seokyoung Bae <sup>1</sup>, and Jae Young Jho <sup>1,\*</sup>**

<sup>1</sup> School of Chemical and Biological Engineering, Seoul National University, Seoul 08826, South Korea; leemk0324@snu.ac.kr

<sup>2</sup> Institute of Advanced Composite Materials, Korea Institute of Science and Technology, Jeonbuk 54896, South Korea; jaehyun0119@kist.re.kr

\* Correspondence: jyjho@snu.ac.kr; Tel.: 82-2-880-8346

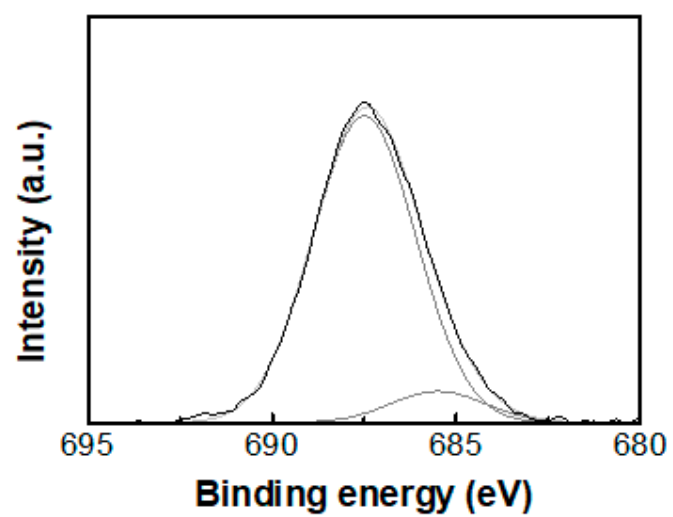

Figure S1. F1s XPS spectra of FGO<sub>12</sub>.

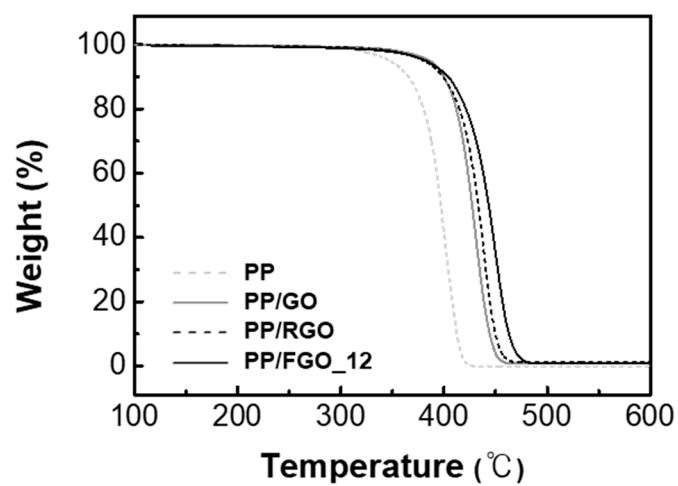

Figure S2. TGA data of PP, PP/GO, PP/RGO, and PP/FGO\_12 composites.
